# Supplementary material for: The role of manual gestures in second language comprehension: a simultaneous interpreting experiment
Source: Front Psychol. 2023 Jun 27;14:1188628. doi: 10.3389/fpsyg.2023.1188628 (PMC10333536; doi:10.3389/fpsyg.2023.1188628)
Supplement: Supplementary file 2 [file Table_2.XLSX]

## Sheet: Tabelle2
Congruent and incongruent gestures - description
(left and right as from the speaker's perspective)
Congruent gestures				Incongruent gestures
Sentence	Gesture label	Gesture description		Sentence	Gesture label	Gesture description
Last Monday, the girl picked the lemon	pick	right hand half closed held at shoulder level palm facing up as if holding something, then coming down		Last Monday, the girl picked the lemon	squeeze	right hand: hand half open in front of speaker, palm facing down, then fist closing with a rotation of the wrist
				Last Monday, the girl squeezed the lemon	pick	right hand half closed held at shoulder level palm facing up as if holding something, then coming down
Two weeks ago, the teacher opened the window	open	right hand closed in a fist held in front of speaker, back of fist facing up, then moving laterally to the right-hand side		Two weeks ago, the teacher opened the window	break	right hand closed in a fist held in front of body at shoulder level, back of fist facing up/the right-hand side, then fist moving forward as if hitting something
				Two weeks ago, the teacher broke the window	open	right hand closed in a fist held in front of speaker, back of fist facing up, then moving laterally to the right-hand side
Last winter, the woman painted the mast	paint	right hand closed in a fist, moving up and down, flexing at wrist, back of fist facing the right-hand side		Last winter, the woman painted the mast	saw	right hand closed in a fist, back of hand facing the right-hand side then moving several times to the front and to the back
				Last winter, the woman sawed the mast	paint	right hand closed in a fist, moving up and down, flexing at wrist, back of fist facing the right-hand side
Last Friday, the woman cut the rope	cut	right hand in a fist as if holding something, back of hand facing up, moving laterally to the left several times		Last Friday, the woman cut the rope	pull	right hand closed in fist in front of body, back of hand facing the right-hand side, then hand coming down, then same up-and-down movement a second time
				Last Friday, the woman pulled the rope	cut	right hand in a fist as if holding something, back of hand facing up, moving laterally to the left several times
Last year, the girl fed the parrot	feed	right hand held in front of body, palm facing up with fingers extended except for thumb, touching the index, doing lateral biphasic movements as if throwing something on the ground		Last year, the girl fed the parrot	pet	right hand open, fingers stretched, held in front of the body, palm facing down, then hand moving down and to the right-hand side, then repeating the move
				Last year, the girl petted the parrot	feed	right hand held in front of body, palm facing up with fingers extended except for thumb, touching the index, doing lateral biphasic movements as if throwing something on the ground
Yesterday, the man released the bird	release	right hand extended, fingers pointing to the front and the left-hand side, then hand moving slightly up and away from the body		Yesterday, the man released the bird	shoot	right hand in C-shape, back of the hand facing the right-hand side, then hand quickly jerking upward then falling back in place
				Yesterday, the man shot the bird	release	right hand extended, fingers pointing to the front and the left-hand side, then hand moving slightly up and away from the body
Last Tuesday, the girl opened the door	open	right hand closed in a fist held in front of speaker, back of fist facing up, then moving laterally to the right-hand side		Last Tuesday, the girl opened the door	spray	right hand held in front of body, fingers bunched together except for index which is extended, palm facing the body, then index flexing and coming back to start position
				Last Tuesday, the girl locked the door	open	right hand closed in a fist held in front of speaker, back of fist facing up, then moving laterally to the right-hand side
Last summer, the nurse sprayed the wound	spray	right hand held in front of body, fingers bunched together except for index which is extended, palm facing the body, then index flexing and coming back to start position twice		Last summer, the nurse sprayed the wound	stitch	right hand half closed with fingers together as if holding something small, fingers facing the body, then hand moving from right to left twice with wrist rotating clockwise as hand is moving to the left
				Last summer, the nurse stitched the wound	spray	right hand held in front of body, fingers bunched together except for index which is extended, palm facing the body, then index flexing and coming back to start position twice
Three days ago, the soldier punched the mayor	punch	right hand in a fist held close to the body, back of fist facing the ground, then arm stretching forward as if hitting something		Three days ago, the soldier punched the mayor	push	right hand open, fingers stretched and pointing up, held in front of body, back of hand facing the body, then hand moving forward as if pushing something away
				Three days ago, the soldier pushed the mayor	punch	right hand in a fist held close to the body, back of fist facing the ground, then arm stretching forward as if hitting something
Last week, the teacher opened the book	open	right hand held in front of body in a fist, back of fist facing up, then wrist turning clockwise by 180 degrees to right-hand side		Last week, the teacher opened the book	close	right palm parallel to the ground, facing up, fingers stretched to the front, then wrist rotating at 180 degrees with the hand moving simulteanously in a semi-circle to the left-hand side and palm ending up facing down
				Last week, the teacher closed the book	open	right hand held in front of body in a fist, back of fist facing up, then wrist turning clockwise by 180 degrees to right-hand side
Two weeks ago, the man brushed the cat	brush	right hand half closed, back of hand facing up and fingers separated, then moving twice from left to right		Two weeks ago, the man brushed the cat	stitch	right hand half closed with fingers together as if holding something small, fingers facing the body, then hand moving from right to left twice with wrist rotating clockwise as hand is moving to the left
				Two weeks ago, the man petted the cat	brush	right hand half closed, back of hand facing up and fingers separated, then moving twice from left to right
Yesterday, the boy sprayed the orchid	spray	right hand held in front of body, fingers bunched together except for index which is extended, palm facing the body, then index flexing and coming back to start position		Yesterday, the boy sprayed the orchid	water	right hand closed in a fist held in front of body at chest level, back of fist to the right-hand side, wrist then rotating to the left so that fingers face down
				Yesterday, the boy watered the orchid	spray	right hand held in front of body, fingers bunched together except for index which is extended, palm facing the body, then index flexing and coming back to start position
A week ago, the pensioner caught the bug	catch	right hand half open held in front of body, back of hand facing up, fingers pointing away from the body, then hand coming up and to the front and closing at the same time		A week ago, the pensioner caught the bug	stitch	right hand half closed with fingers together as if holding something small, fingers facing the body, then hand moving from right to left twice with wrist rotating clockwise as hand is moving to the left
				A week ago, the pensioner swatted the bug	catch	right hand half open held in front of body, back of hand facing up, fingers pointing away from the body, then hand coming up and to the front and closing at the same time
Two months ago, the child flipped the coin	flip	right hand held in a first in front of body, thumb and index touching, tip of thumb under tip of index, back of fist facing the right-hand side, then index releasing thumb, which moves up		Two months ago, the child flipped the coin	cut	right hand in a fist as if holding something, back of hand facing up, moving laterally to the left several times
				Two months ago, the child spun the coin	flip	right hand held in a first in front of body, thumb and index touching, tip of thumb under tip of index, back of fist facing the right-hand side, then index releasing thumb, which moves up
Last spring, the gardener hammered the post	hammer	right hand closed as if holding something in front of speaker, back of hand facing the right-hand side, then hand moving up and down twice		Last spring, the gardener hammered the post	shake	right hand in O-shape, back of hand facing the right-hand side, fingers bunched together except for thumb, then hand moving repeatedly from back to front
				Last Spring, the gardener shook the post	hammer	right hand closed as if holding something in front of speaker, back of hand facing the right-hand side, then hand moving up and down twice
Two years ago, the man sprinkled the pepper	sprinkle	right hand in C-shape held in front of body, back of hand facing up/the body, then repeatedly moving from left to right		Two years ago, the man sprinkled the pepper	open	right hand closed in a fist held in front of speaker, back of fist facing up, then moving laterally to the right-hand side
				Two years ago, the man ground the pepper	sprinkle	right hand in C-shape held in front of body, back of hand facing up/the body, then repeatedly moving from left to right
Last autumn, the boy dived into the river	dive	right hand at shoulder level, palm facing down, fingers not quite extended, pointing down then hand going down and to the left-hand side		Last autumn, the boy dived into the river	swim	right hand held in front of body, fingers half spread pointing to the left-hand side, palm facing down, then hand moving to the left-hand side
				Last autumn, the boy swam across the river	dive	right hand at shoulder level, palm facing down, fingers not quite extended, pointing down then hand going down and to the left-hand side
Last month, the child climbed up the cliff	climb	right hand held diagonally in front of body at hip level, fingers pointing up, palm facing down, then hand moving up and to the left-hand side		Last month, the child climbed up the cliff	jump	right hand held open at shoulder level, palm facing down, fingers pointing to the left, then hand quickly moving down and to the left
				Last month, the child jumped from the cliff	climb	right hand held diagonally in front of body at hip level, fingers pointing up, palm facing down, then hand moving up and to the left-hand side
Two days ago, the plane crashed in the lake	crash	right hand at shoulder level, palm facing down, fingers extended, pointing down then hand going down and to the left-hand side		Two days ago, the plane crashed in the lake	circle	right hand: index pointing up and making a circular motion (full circle)
				Two days ago, the plane flew above the lake	crash	right hand at shoulder level, palm facing down, fingers extended, pointing down then hand going down and to the left-hand side
Last night, the cyclist swerved on the road	swerve	right hand: palm facing the left-hand side, extended fingers pointing away from speaker, hand then moving in a semi-circle to the right-hand side and away from the body		Last night, the cyclist swerved on the road	walk	right hand held at waist level, palm facing down, fingers pointing to the left-hand side, then wrist rotating to that fingers point up and hand moving diagonally upwards to shoulder level
				Last night, the cyclist fell on the road	swerve	right hand: palm facing the left-hand side, extended fingers pointing away from speaker, hand then moving in a semi-circle to the right-hand side and away from the body
Two weeks ago, the boy climbed up the rope	climb	right hand held vertically in front of body at hip level, fingers pointing up, then hand moving up to shoulder level		Two weeks ago, the boy climbed up the rope	swing	right hand open at chest level, fingers pointing away from the body, then hand moving to the left-hand side in a semi-circle with a twist of the wrist, ending with palm facing up
				Two weeks ago, the boy swung on the rope	climb	right hand held vertically in front of body at hip level, fingers pointing up, then hand moving up to shoulder level
Last Winter, the missile hit in the desert	hit	right hand open, palm facing down with the wrist higher than the fingers, then hand quickly moving downward diagonally		Last Winter, the missile hit in the desert	circle	right hand: index pointing up and making a circular motion (full circle)
				Last Winter, the missile flew above the desert	hit	right hand open, palm facing down with the wrist higher than the fingers, then hand quickly moving downward diagonally
Three weeks ago, the ball rolled across the grass	roll	right hand closed held at chest level with index pointing to the left, back of hand facing up, then hand moving to the left-hand side and away from the speaker		Three weeks ago, the ball rolled across the grass	climb	right hand held vertically in front of body at hip level, fingers pointing up, then hand moving up to shoulder level
				Three weeks ago, the ball bounced on the grass	roll	right hand closed held at chest level with index pointing to the left, back of hand facing up, then hand moving to the left-hand side and away from the speaker
A year ago, the lion crawled around the rock	crawl	right hand held at chest level, palm facing the left-hand side, extended fingers pointing away from speaker, hand then moving in a semi-circle to the right-hand side and away from the body		A year ago, the lion crawled around the rock	bounce	right hand open with index extended pointing away from the speaker, then hand moving twice in semicircles up then down and to the right-hand side
				A year ago, the lion jumped on the rock	crawl	right hand held at chest level, palm facing the left-hand side, extended fingers pointing away from speaker, hand then moving in a semi-circle to the right-hand side and away from the body
Two months ago, the fly landed on the branch	land	right hand open, palm facing down with the wrist higher than the fingers, then hand moving downward diagonally		Two months ago, the fly landed on the branch	rear	right hand held flat in front of body at waist level, palm facing down, fingers pointing to the left-hand side, then elbow rotating so that forarm sways to the right-hand side then slightly to the left, fingers pointing up and palm facing the left-hand side
				Two months ago, the fly crept on the branch	land	right hand open, palm facing down with the wrist higher than the fingers, then hand moving downward diagonally
Three days ago, the teenager tumbled down the staircase	tumble	right hand open held at shoulder level, palm facing down, fingers pointing to the left, then fingers pointing down with a flick of the wrist and hand moving diagonally downwards to hip level		Three days ago, the teenager tumbled down the staircase	walk	right hand held at waist level, palm facing down, fingers pointing to the left-hand side, then wrist rotating to that fingers point up and hand moving diagonally upwards to shoulder level
				Three days ago, the teenager walked up the staircase	tumble	right hand open held at shoulder level, palm facing down, fingers pointing to the left, then fingers pointing down with a flick of the wrist and hand moving diagonally downwards to hip level
Last Wednesday, the bird hopped into the cage	hop	right hand held half open in front of body at waist level, fingers half-closed pointing to the left-hand side, then hand moving up and to the left-hand side		Last Wednesday, the bird hopped into the cage	sway	right hand: fingers extended, palm vertical facing the side, moving to the right then to the left-hand side with a flick of the wrist
				Last Wednesday, the bird flew from the cage	hop	right hand held half open in front of body at waist level, fingers half-closed pointing to the left-hand side, then hand moving up and to the left-hand side
Yesterday, the rabbit hopped into the burrow	hop	right hand held half open in front of body at waist level, fingers together pointing away from the speaker, then wrist rotating so that fingers point to the left-hand side and hand moving up and to the left-hand side		Yesterday, the rabbit hopped into the burrow	sway	right hand: fingers extended, palm vertical facing the side, moving to the right then to the left-hand side with a flick of the wrist
				Yesterday, the rabbit darted from the burrow	hop	right hand held half open in front of body at waist level, fingers together pointing away from the speaker, then wrist rotating so that fingers point to the left-hand side and hand moving up and to the left-hand side
Practice items
Three days ago, the man opened the bottle	open	right hand almost closed in a fist, index and thumb together facing down, then quick clockwise movement of the wrist so that back of fist faces the right-hand side
Last summer, the girl threw the ball	throw	right hand moving up close to the shoulder, fingers half extended, then moving forcefully away from the body towards the front
Last summer, the boat capsized in the lake	capsize	right hand open, fingers stretched to the front, back of hand facing up, then wrist turning by 180 degrees clockwise
				Last year, the worker turned the handle	pull	right hand in a fist in front of body, fingers to the front, back of hand facing up, then fist closing coming closer to the chest
				Two months ago, the snow slid from the roof	overturn	right hand held at waist level, palm up, fingers together pointing away from the body, palm facing the side, then rotation of the wrist so that the palm faces down
				Four years ago, the cat ran from the mouse	leap	right hand held diagonally in front of body, fingers up, moving quickly up and to the right with fingers flexed
				Three weeks ago, the tree fell in the street	swerve	right hand: palm facing the left-hand side, extended fingers pointing away from speaker, hand then moving in a semi-circle to the right-hand side and away from the body
